# Supplementary material for: The facile ionic liquid-assisted synthesis of hollow and porous platinum nanotubes with enhanced catalytic performances
Source: Royal Society of Chemistry journal article supplement (doi:10.1039/c6ra13451c), 2016-01-01
Supplement: c6ra13451c1.pdf [file c6ra13451c1.pdf]

## Supporting Information

### **The facile ionic liquid-assisted synthesis of hollow and porous platinum nanotubes with enhanced catalytic performances†**

Zhu-Qing Wu,<sup>‡a</sup> Yi-Gang Ji,<sup>‡b</sup> Ya-Nan Zhai,<sup>a</sup> Shu-Ni Li<sup>\*a</sup> and Jong-Min Lee<sup>\*c</sup>

<sup>a</sup> Key Laboratory of Macromolecular Science of Shaanxi Province, School of Chemistry & Chemical Engineering, Shaanxi Normal University, Xi'an 710062, PR China

<sup>b</sup> Jiangsu Key Laboratory of Biofunction Molecule, Department of Life Sciences and Chemistry, Jiangsu Second Normal University, Nanjing 210013, PR China

<sup>c</sup> School of Chemical and Biomedical Engineering Nanyang Technological University, Singapore 637459, Singapore

\*The corresponding authors:

E-mail: lishuni@snnu.edu.cn (S. Li) or jmlee@ntu.edu.sg (J.-M. Lee)

## Experimental section

### Reagents and chemicals

1-(2'-hydroxyethyl)-3-methylimidazolium tetrafluoroborate ionic liquid (HOEtMIMBF<sub>4</sub>, Scheme S1) was purchased from Shanghai Cheng Jie Chemical Co., Ltd. Potassium tetrachloroplatinate(II) (K<sub>2</sub>PtCl<sub>4</sub>), 4-nitrophenol, potassium ferricyanide(III) (K<sub>3</sub>[Fe(CN)<sub>6</sub>]), and sodium borohydride (NaBH<sub>4</sub>) were purchased from Sinopharm Chemical Reagent Co., Ltd. Commercial Pt black was purchased from Johnson Matthey Corp. Other reagents were of analytical reagent grade and used without further purification.

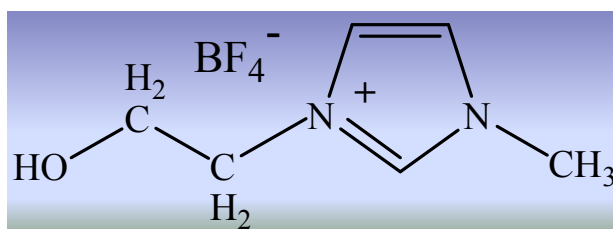

**Scheme S1.** The molecular structure of HOEtMIMBF<sub>4</sub>.

### Synthesis hollow and porous platinum nanotubes (Pt-HPNTs)

In a typical procedure, 0.5 mL of 0.048 M K<sub>2</sub>PtCl<sub>4</sub> aqueous solution, 2.4 mL of 0.5 M HOEtMIMBF<sub>4</sub> aqueous solution, and 2.88 mg of SiO<sub>2</sub> nanorods<sup>1</sup> were added into 5.0 mL deionized water. After adjusting solution pH to 6.0, the mixture was heated to 80 °C for 10 h under continuous stirring conditions. And then, the reaction solution was transferred into the reaction kettle and heated in constant temperature of 180 °C for 15 h. Finally, the obtained Pt-HPNTs were separated by centrifugation, washed with deionized water, and then dried in a vacuum at 60 °C for 12 h.

### Catalytic reduction of 4-nitrophenol

Typically, 2 mL of  $2.0 \times 10^{-4}$  M 4-nitrophenol aqueous solution and 1.0 mL of 0.1M  $\text{NaBH}_4$  aqueous solution were mixed in a quartz cuvette. Then, 25  $\mu\text{L}$  of Pt-HPNTs aqueous solution ( $2.0 \text{ g L}^{-1}$ ) were added into the quartz cuvette at room temperature ( $25 \text{ }^\circ\text{C}$ ). The catalytic reduction of 4-nitrophenol was monitored by time-dependent UV–vis spectra. For comparison, commercial Pt black was also used as heterogeneous catalysts for the reduction of 4-nitrophenol.

### **Catalytic reduction of potassium ferricyanide**

For the catalytic reduction of potassium ferricyanide ( $\text{K}_3[\text{Fe}(\text{CN})_6]$ ), 0.5 mL of 0.01 M  $\text{K}_3[\text{Fe}(\text{CN})_6]$  aqueous solution, 1.0 mL of 0.1 M  $\text{NaBH}_4$  aqueous solution, and 2.0 mL  $\text{H}_2\text{O}$  were mixed in a quartz cuvette. Then, 10  $\mu\text{L}$  of Pt-HPNTs aqueous solution ( $2.0 \text{ g L}^{-1}$ ) were added into the quartz cuvette at room temperature ( $25 \text{ }^\circ\text{C}$ ). The catalytic reduction of  $\text{K}_3[\text{Fe}(\text{CN})_6]$  was monitored by time-dependent UV–vis spectra. For comparison, commercial Pt black was also used as heterogeneous catalysts for the reduction of  $\text{K}_3[\text{Fe}(\text{CN})_6]$ .

### **Characterization**

X-ray powder diffraction (XRD, Model D/max-rC) and Brunauer–Emmett–Teller (BET, ASAP 2020 HD88 ) were used to investigate product structure. Transmission electron microscopy (TEM, EOL JEM-2100F) and Scan electron microscopy (SEM FEI Quanta 200) were used to investigate product morphology. X-ray photoelectron spectroscopy (XPS, AXIS ULTRA) was used to surface composition investigate

surface composition of products. Scanning transmission electron microscopy-energy dispersive spectroscopy (STEM-EDX, EOL JEM-2100F) was used to investigate the element distribution of the samples. Ultraviolet–visible spectroscopy (UV–vis, UV2600) was used to investigate the catalytic activity of catalysts.

**Additional Figures:**

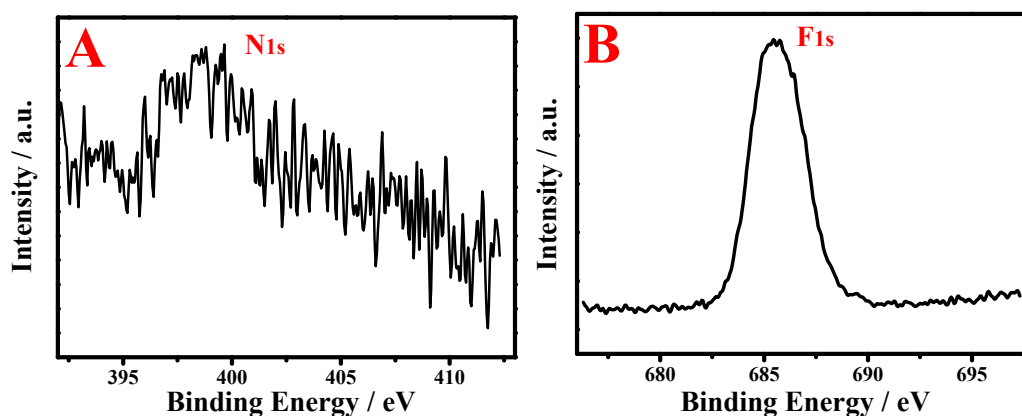

**Figure S1.** (A) N1s and (B) F1s XPS spectra of the Pt-HPNTs.

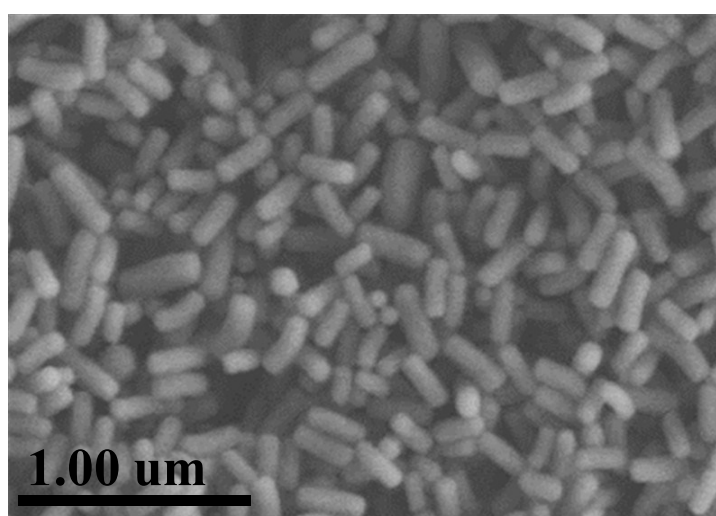

**Figure S2.** SEM image of the SiO<sub>2</sub> nanorods.

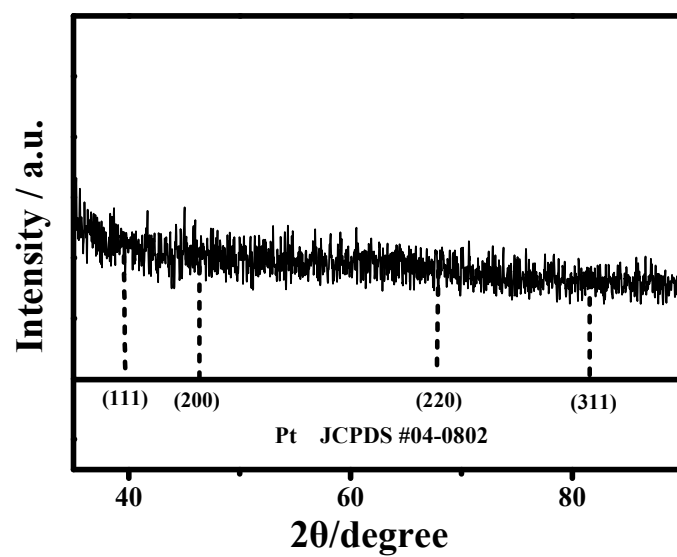

**Figure S3.** XRD pattern of the HOEtMIMBF<sub>4</sub>-Pt<sup>II</sup> complex precipitate.

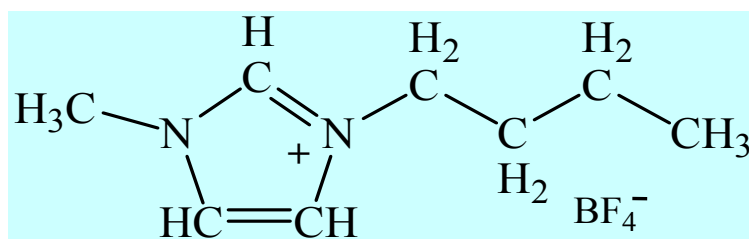

**Scheme S2.** The molecular structures of BMIMBF<sub>4</sub>.

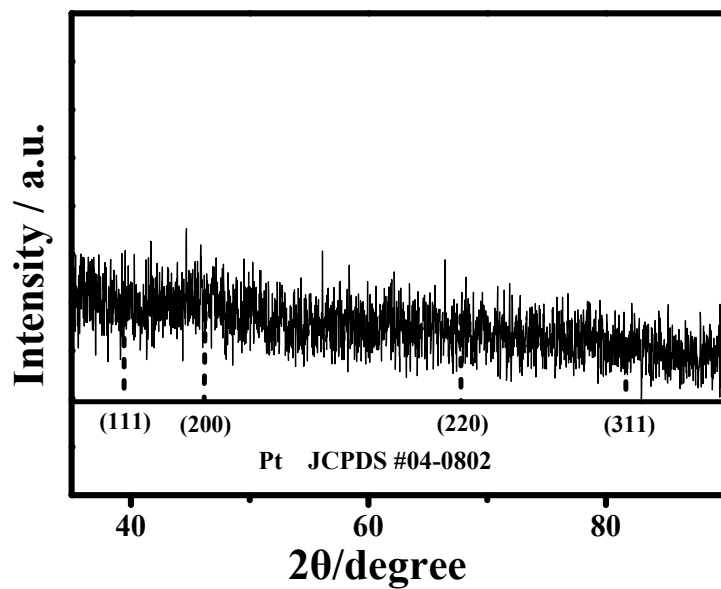

**Figure S4.** XRD pattern of the  $\text{BMIMBF}_4\text{-Pt}^{\text{III}}$  complex precipitate after heating 15 h at 180 °C.

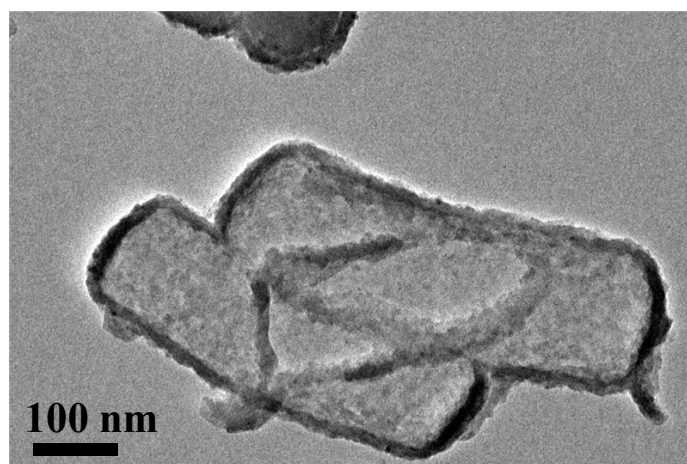

**Figure S5.** TEM images of the hollow and porous Pd nanotubes prepared by replacing  $\text{K}_2\text{PtCl}_4$  with  $\text{K}_2\text{PdCl}_4$  as reaction precursor under same experimental conditions.

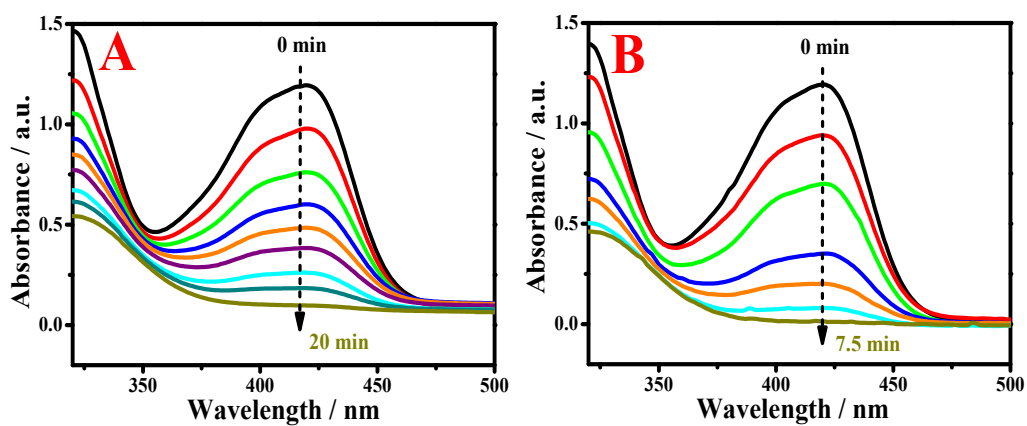

**Figure S6.** Successive UV-vis spectra of  $K_3[Fe(CN)_6]$  reduction by  $NaBH_4$  using (A) the Pt black and (B) the Pt-HPNTs as catalysts.

## REFERENCES

1. K. Zhao, C. Wu, Z. Deng, Y. Guo and B. Peng, *RSC Adv.*, 2015, **5**, 52726.
